# Supplementary material for: Insight into live bird markets of Bangladesh: an overview of the dynamics of transmission of H5N1 and H9N2 avian influenza viruses
Source: PubMed Central journal article supplement (PMC5378921; doi:10.1038/emi.2016.142), 2017-03-08
Supplement: emi2016142x2.pdf [file emi2016142x2.pdf]

**Figure S2**

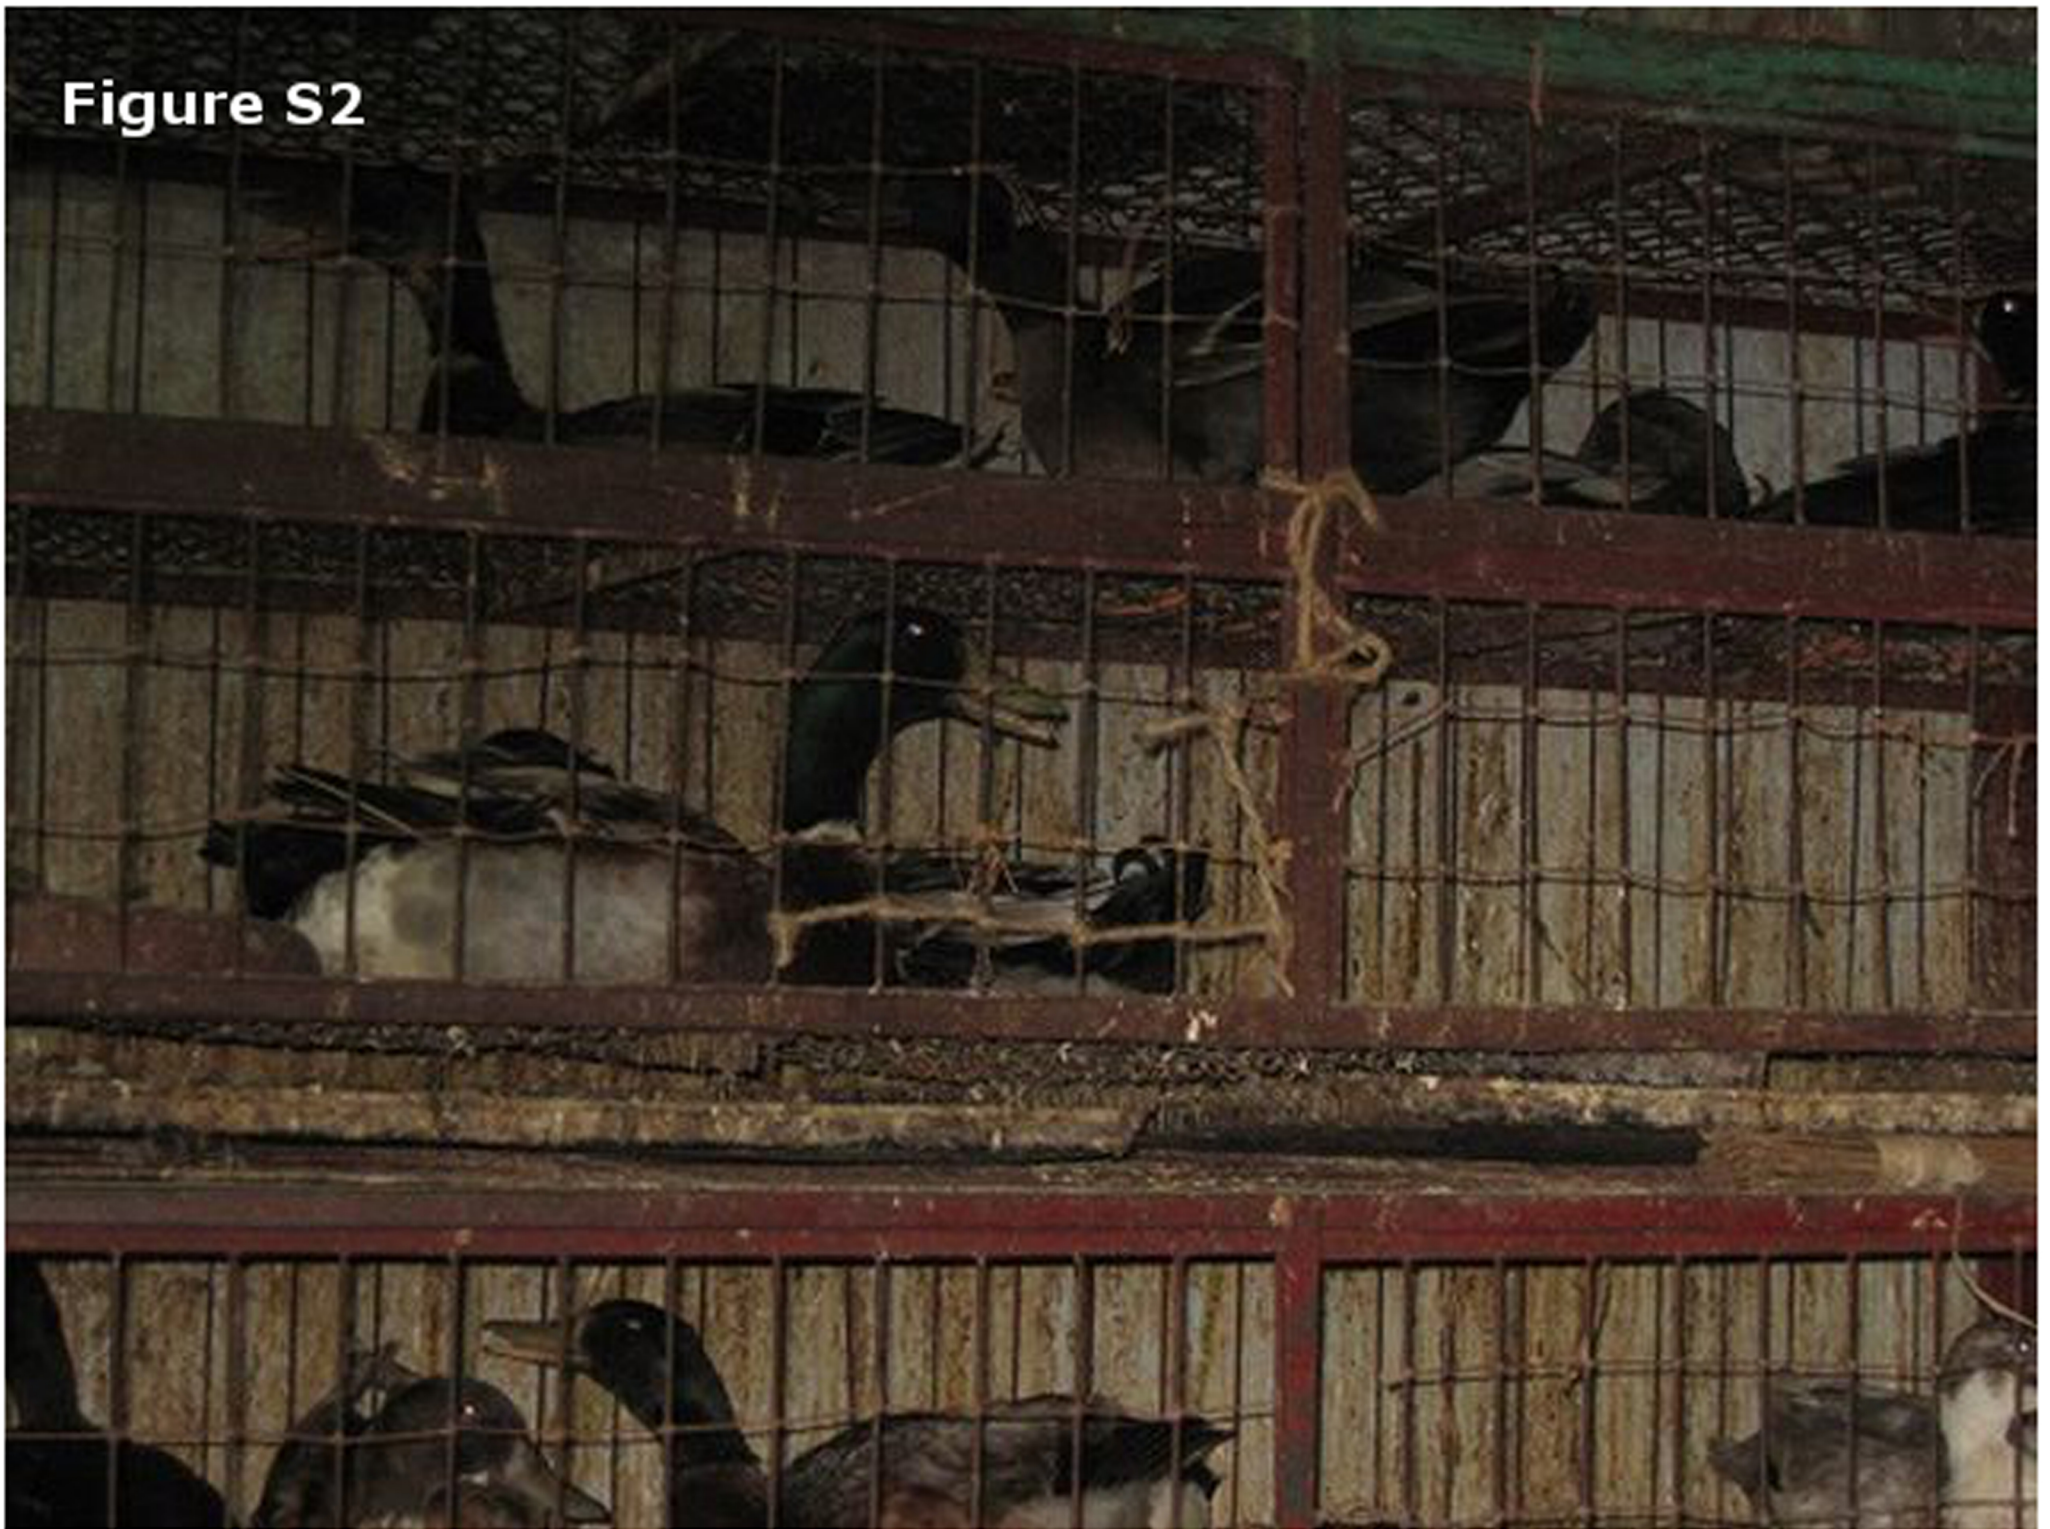

**Supplementary Figure S2** Domestic ducks in the retail markets are housed in multistory wire cages, similar to those that house chickens, and have continuous access to food and water.
