# Supplementary material for: Insight into live bird markets of Bangladesh: an overview of the dynamics of transmission of H5N1 and H9N2 avian influenza viruses
Source: PubMed Central journal article supplement (PMC5378921; doi:10.1038/emi.2016.142), 2017-03-08
Supplement: emi2016142x3.pdf [file emi2016142x3.pdf]

**Figure S3**

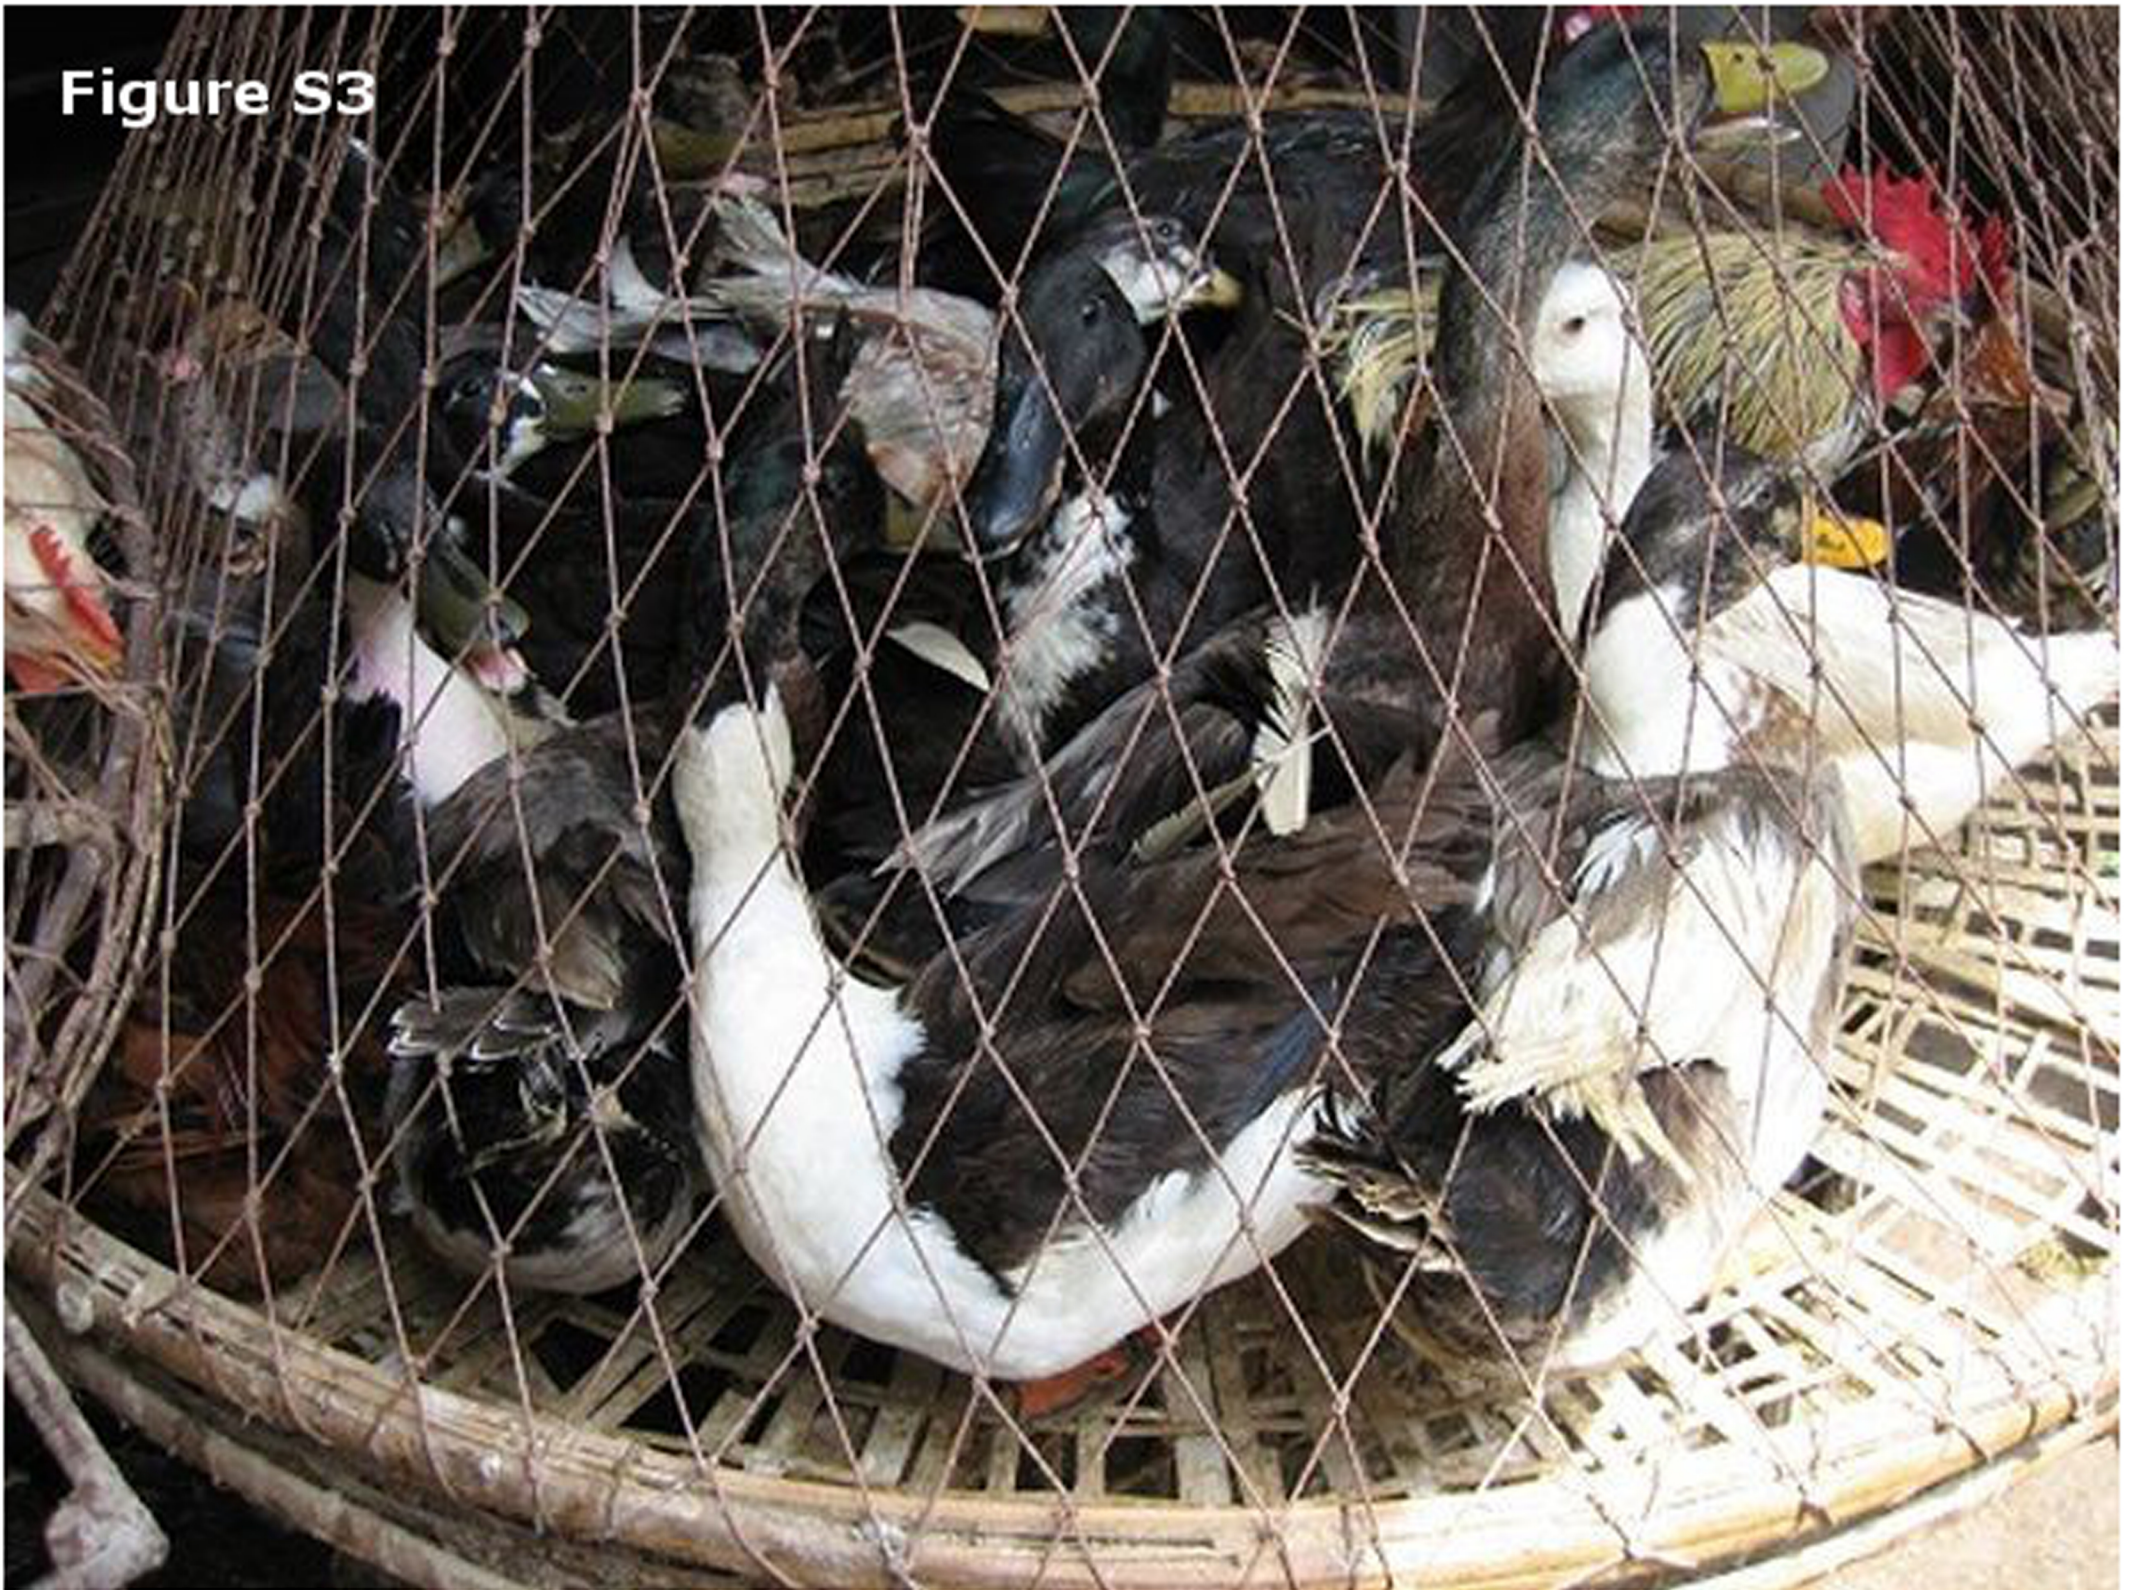

**Supplementary Figure S3** Interspecies housing of ducks and chickens in bamboo cages in LBMs in Bangladesh. The cohousing of ducks and chickens can allow for interspecies transmission of AIVs in LBMs.
